# Supplementary material
Source: Springer Nature journal article supplement (https://www.springermedizin.de/resource/supplementary/12872_2006_138_MOESM4_ESM.pdf/9431100)

**A**

Normal (III-301MN)

CXMD<sub>J</sub> (III-302MA)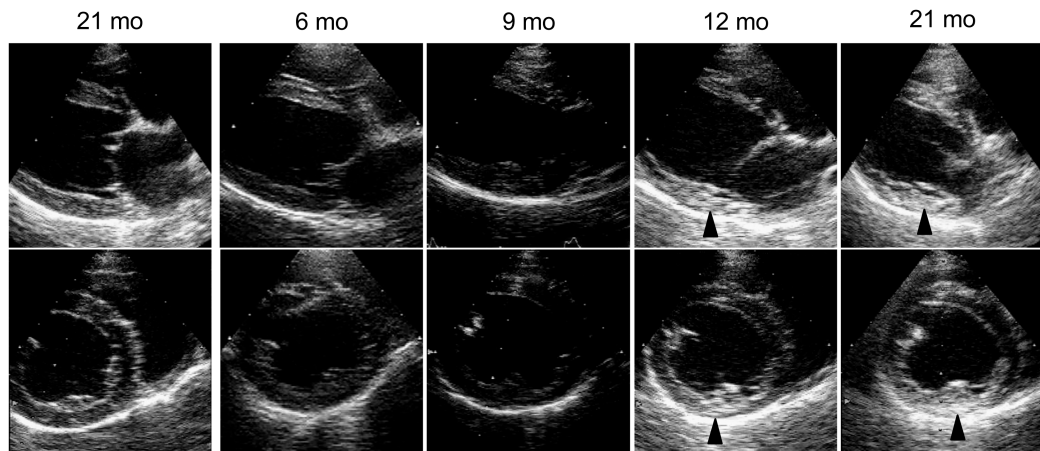**B**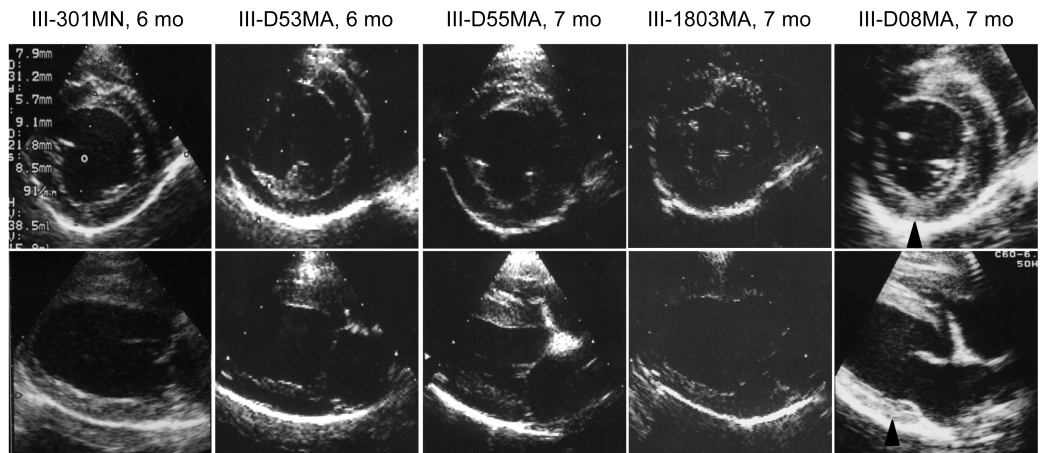

Supplement: MOESM4 [file 9431100]
